# Supplementary material for: In Vivo Response to Methotrexate Forecasts Outcome of Acute Lymphoblastic Leukemia and Has a Distinct Gene Expression Profile
Source: PLOS journal article supplement (doi:10.1371/journal.pmed.0050083), 2008-04-09
Supplement: S1 (10.1371/journal.pmed.0050083.s001) [file journal.pmed.0050083.s001]

**Supplement Table 1**. The top ten (of 37) GenMAPP (**A**) and GO-BP (of 319) (**B**) pathways associated with WBC∆Day3. The column titled “Probe-set correlations with WBCΔDay3” indicates whether most probe-sets in the pathway have a positive correlation, a negative correlation or a mixture of positive and negative correlations with WBC∆Day3

| **GenMAPP Pathway** | **# of Probe-sets** | **p-value** | **Probe-set correlations with WBCΔDay3** | **Bonferroni adj. p-value** |
| --- | --- | --- | --- | --- |
| Proteasome_Degradation | 100 | 5.E-07 | Mixture | 2.E-05 |
| Cell_cycle_KEGG | 110 | 1.E-06 | Negative | 4.E-05 |
| DNA_replication_Reactome | 62 | 4.E-06 | Negative | 1.E-04 |
| TGF_Beta_Signaling_Pathway | 50 | 5.E-05 | Positive | 2.E-03 |
| G1_to_S_cell_cycle_Reactome | 82 | 1.E-04 | Negative | 4.E-03 |
| MAPK_Cascade | 39 | 4.E-04 | Positive | 2.E-02 |
| Electron_Transport_Chain | 117 | 1.E-03 | Negative | 4.E-02 |
| Integrin-mediated_cell_adhesion_KEGG | 102 | 2.E-03 | Positive | 7.E-02 |
| Wnt_signaling | 58 | 4.E-03 | Mixture | 1.E-01 |
| Mitochondrial_fatty_acid_betaoxidation | 25 | 4.E-03 | Negative | 1.E-01 |
| Nucleotide_Metabolism | 25 | 4.E-03 | Negative | 1.E-01 |

**A)**

B)

| **GO-BP Pathway** | **# of Probe-sets** | **p-value** | **Probe-set correlations with WBCΔDay3** | **Bonferroni adj. p-value** |
| --- | --- | --- | --- | --- |
| cell division | 142 | 2.E-07 | Negative | 7.E-05 |
| Mitosis | 103 | 5.E-07 | Negative | 2.E-04 |
| phosphoinositide-mediated signaling | 16 | 2.E-06 | Negative | 6.E-04 |
| regulation of mitosis | 20 | 3.E-06 | Negative | 1.E-03 |
| cell cycle | 280 | 4.E-06 | Mixture | 1.E-03 |
| mitotic spindle organization and biogenesis | 13 | 5.E-06 | Negative | 1.E-03 |
| DNA repair | 135 | 5.E-06 | Negative | 2.E-03 |
| antigen processing, endogenous antigen via MHC class I | 37 | 9.E-06 | Positive | 3.E-03 |
| DNA replication | 122 | 1.E-05 | Negative | 4.E-03 |
| regulation of progression through cell cycle | 233 | 2.E-05 | Mixture | 8.E-03 |
| response to drug | 12 | 3.E-05 | Mixture | 8.5E-03 |
| immune response | 295 | 3.E-05 | Positive | 9.6E-03 |
| nucleotide biosynthesis | 15 | 3.E-05 | Negative | 1.E-02 |
