# Supplementary figures and images for: In Vivo Response to Methotrexate Forecasts Outcome of Acute Lymphoblastic Leukemia and Has a Distinct Gene Expression Profile
Source: PLOS journal article supplement (doi:10.1371/journal.pmed.0050083), 2008-04-09

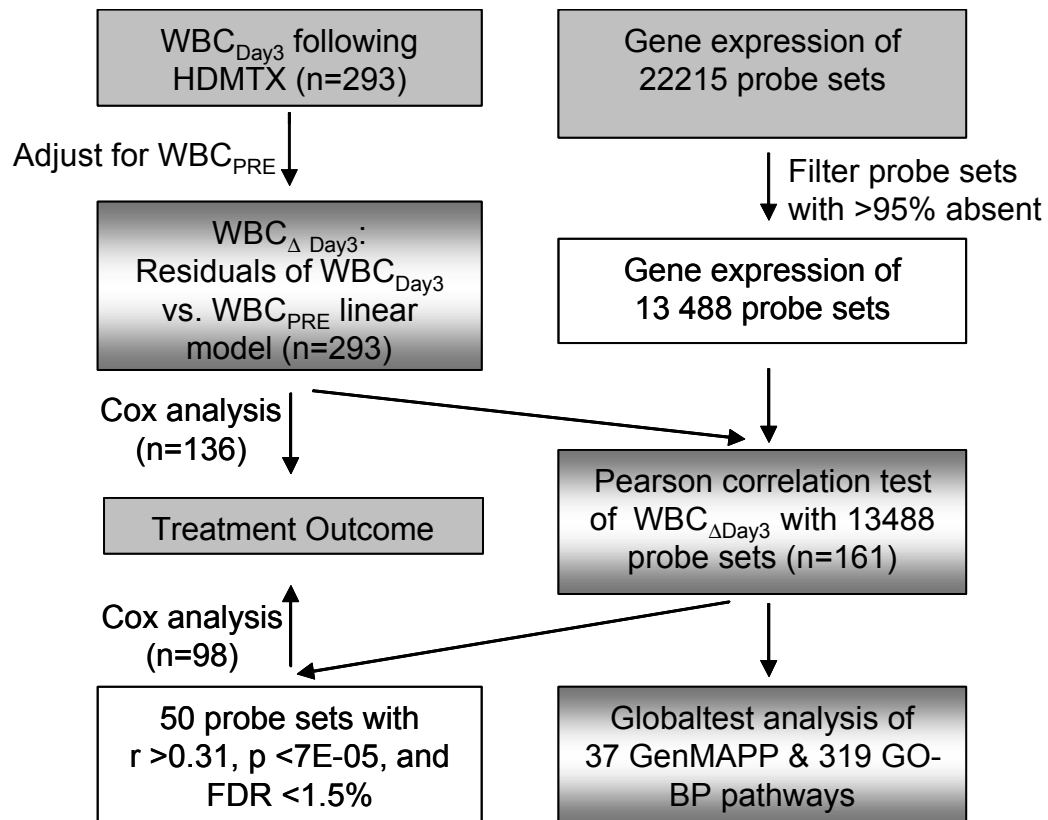

Supplement: S1 (10.1371/journal.pmed.0050083.s001) [file journal.pmed.0050083.s001]
